# Supplementary material
Source: Royal Society of Chemistry journal article supplement (doi:10.1039/d6gc00083e)
Supplement: d6gc00083e1.pdf [file d6gc00083e1.pdf]

## Supporting Information

### **Machine learning boosted Design of Ionic Liquid-based Deep Eutectic Solvents for CO<sub>2</sub> Capture**

Ruina Zhang,<sup>[a]</sup> Guokai Cui,<sup>\*[a]</sup> Guoxiong Zhan,<sup>[b]</sup> Mengyi Ma,<sup>[a]</sup> Xiaochun Zhang,<sup>[b]</sup> Xiangping Zhang,<sup>\*[b,c]</sup> and Hanfeng Lu<sup>\*[a]</sup>

<sup>[a]</sup> Innovation Team of Air Pollution Control, Institute of Catalytic Reaction Engineering, Zhejiang Key Laboratory of Surface and Interface Science and Engineering for Catalysts, State Key Laboratory of Green Chemical Synthesis and Conversion, College of Chemical Engineering, Zhejiang University of Technology, Hangzhou 310014, China.

<sup>[b]</sup> Center of Ionic Liquids and Green Energy, Beijing Key Laboratory of Solid State Battery and Energy Storage Process, State Key Laboratory of Mesoscience and Engineering, Institute of Process Engineering, Chinese Academy of Sciences, Beijing 100190, China

<sup>[c]</sup> State Key Laboratory of Heavy Oil Processing, College of Chemical Engineering and Environment, China University of Petroleum (Beijing), Beijing 102249, China

\* Correspondence: [chemcgk@163.com](mailto:chemcgk@163.com) (G Cui); [xpzhang@ipe.ac.cn](mailto:xpzhang@ipe.ac.cn) (X Zhang); [luhf@zjut.edu.cn](mailto:luhf@zjut.edu.cn) (H Lu).

ORCID: <https://orcid.org/0000-0002-7223-2869> (G Cui)

Table S1. Databank of abbreviations of ILs, full name of HBDs, molar ratios of HBD to IL, temperature (in K), partial pressure (in kPa), and CO<sub>2</sub> absorption capacity (in g/kg) for DESs.

| Entry | Type     | IL         | HBD                  | HBD:IL ratio | molar | <i>T</i> (K) | <i>P</i> (kPa)  | CO <sub>2</sub> capacity (g/kg) | Ref. |
|-------|----------|------------|----------------------|--------------|-------|--------------|-----------------|---------------------------------|------|
| 1     | ammonium | [ACh][Cl]  | 1,2,4-Triazole       | 1            |       | 303~333      | 56.3~593.2      | 0.6~9.6                         | 1    |
| 2     | ammonium | [ACh][Cl]  | Guaiacol             | 3~5          |       | 293~323      | 48.6~558.6      | 0.5~8.6                         | 2    |
| 3     | ammonium | [ACh][Cl]  | Imidazole            | 1.5~3        |       | 303~333      | 26.3~594        | 0.3~12.9                        | 1    |
| 4     | ammonium | [ACh][Cl]  | Levulinic acid       | 3            |       | 303~333      | 65.7~576.4      | 1.1~13.2                        | 3    |
| 5     | ammonium | [BHDE][Cl] | Acetic acid          | 2            |       | 298          | 210~2026        | 2.8~37.1                        | 4    |
| 6     | ammonium | [BHDE][Cl] | Lactic acid          | 2            |       | 298          | 283~2086        | 0.7~21.9                        | 4    |
| 7     | ammonium | [BTEA][Cl] | 2-Ethylaminoethanol  | 4            |       | 303~323      | 103.832~1829.42 | 40.3~123.1                      | 5    |
| 8     | ammonium | [BTEA][Cl] | 2-Methylaminoethanol | 4            |       | 303~323      | 377.537~1337.62 | 64.3~106.7                      | 5    |
| 9     | ammonium | [BTEA][Cl] | Acetic acid          | 2            |       | 298          | 325~2054        | 5.6~42.9                        | 4    |
| 10    | ammonium | [BTMA][Cl] | Acetic acid          | 2            |       | 298          | 219~2037        | 3.4~64.0                        | 4    |
| 11    | ammonium | [BTMA][Cl] | Glycerol             | 2            |       | 298          | 394~2026        | 1.6~11.4                        | 4    |
| 12    | ammonium | [Ch][Cl]   | Diethanolamine       | 4            |       | 303          | 100             | 147.5                           | 6    |
| 13    | ammonium | [Ch][Cl]   | Ethanolamine         | 2~6          |       | 303          | 100             | 137.1~252.5                     | 6    |
| 14    | ammonium | [Ch][Cl]   | Methyldiethanolamine | 4~5          |       | 303          | 100             | 38.4~42.9                       | 6    |
| 15    | ammonium | [Ch][Cl]   | Triethanolamine      | 4~5          |       | 303          | 100             | 39.9~59.5                       | 6    |
| 16    | ammonium | [Ch][Cl]   | 1,2-Butanediol       | 4            |       | 303~333      | 371.3~3443.3    | 3.8~47.3                        | 7    |

|    |          |          |                      |       |         |                 |            |             |
|----|----------|----------|----------------------|-------|---------|-----------------|------------|-------------|
| 17 | ammonium | [Ch][Cl] | 1,2-Propanediol      | 3~4   | 293~323 | 104.4~525.6     | 0.9~8.3    | 8           |
| 18 | ammonium | [Ch][Cl] | 1,4-Butanediol       | 3~4   | 293~323 | 105.8~525.9     | 1.0~7.1    | 8           |
| 19 | ammonium | [Ch][Cl] | 2,3-Butanediol       | 3~4   | 293~323 | 107.1~528.8     | 1.1~8.4    | 8           |
| 20 | ammonium | [Ch][Cl] | Diethanolamine       | 6     | 298~303 | 523.4~1000      | 13.3~40.8  | 9, 10       |
| 21 | ammonium | [Ch][Cl] | Diethylene glycol    | 3~4   | 293~323 | 110.4~1119.7    | 0.9~14.6   | 10,<br>11   |
| 22 | ammonium | [Ch][Cl] | Ethanolamine         | 2~7   | 298~328 | 182~4504        | 22.1~248.6 | 4, 9,<br>12 |
| 23 | ammonium | [Ch][Cl] | Ethylene glycol      | 2~8   | 298~343 | 36~6323         | 0.4~137.6  | 9, 10       |
| 24 | ammonium | [Ch][Cl] | Ethylenecyanohydrin  | 2~3   | 298~328 | 114.2~1414.8    | 1.9~62.2   | 13          |
| 25 | ammonium | [Ch][Cl] | Furfuryl alcohol     | 3~5   | 303~333 | 65.2~586.4      | 0.7~10.0   | 14          |
| 26 | ammonium | [Ch][Cl] | Glycerol             | 2~8   | 298~343 | 187~6347        | 2.4~162.5  | 9, 15       |
| 27 | ammonium | [Ch][Cl] | Guaiacol             | 3~5   | 293~323 | 46.9~545.9      | 0.5~8.3    | 2           |
| 28 | ammonium | [Ch][Cl] | Levulinic acid       | 3~5   | 303~333 | 60~587.4        | 0.9~12.6   | 14          |
| 29 | ammonium | [Ch][Cl] | Methyldiethanolamine | 6~7   | 303     | 445.6~1096      | 42.9~89.6  | 10          |
| 30 | ammonium | [Ch][Cl] | Phenol               | 2~4   | 293~333 | 99~13300        | 1.0~176.4  | 11,<br>16   |
| 31 | ammonium | [Ch][Cl] | Succinimide          | 1.7~6 | 313~333 | 293.834~1149.06 | 0.7~1.0    | 17          |
| 32 | ammonium | [Ch][Cl] | Triethanolamine      | 4     | 298     | 1000            | 13.0       | 9           |
| 33 | ammonium | [Ch][Cl] | Triethylene glycol   | 3~4   | 293~323 | 109.3~520.3     | 1.0~8.5    | 11          |
| 34 | ammonium | [Ch][Cl] | Urea                 | 1.5~4 | 298~343 | 40.5~12730      | 0.5~227.4  | 18          |

|    |          |                            |                      |     |         |                 |            |            |
|----|----------|----------------------------|----------------------|-----|---------|-----------------|------------|------------|
| 35 | ammonium | [Ch][Pro]                  | Ethylene glycol      | 3~5 | 298     | 100             | 59.1~71.8  | 19         |
| 36 | ammonium | [DEA][Cl]                  | Guaiacol             | 3~5 | 293~323 | 45.1~550.7      | 0.7~10.2   | 2          |
| 37 | ammonium | [MOE-DEMA][1,2,3-<br>Triz] | Ethylene glycol      | 2~4 | 298     | 100             | 75.1~100.1 | 20         |
| 38 | ammonium | [MOE-DEMA][1,2,3-<br>Triz] | Pinacol              | 2~4 | 298     | 100             | 19.2~28.3  | 20         |
| 39 | ammonium | [TBA][1,2,3-Triz]          | Ethylene glycol      | 2~4 | 298     | 100             | 63.0~81.0  | 21         |
| 40 | ammonium | [TBA][Br]                  | 2-Ethylaminoethanol  | 4   | 303~323 | 210.655~1425.19 | 32.6~88.2  | 5          |
| 41 | ammonium | [TBA][Br]                  | 2-Methylaminoethanol | 4   | 303~323 | 101.488~1177.27 | 38.9~106.0 | 5          |
| 42 | ammonium | [TBA][Br]                  | Acetic acid          | 2   | 298     | 388~2011        | 6.0~49.7   | 4          |
| 43 | ammonium | [TBA][Br]                  | Decanoic acid        | 2   | 303~323 | 419~1138        | 7.8~29.9   | 22         |
| 44 | ammonium | [TBA][Br]                  | Diethanolamine       | 6   | 298~303 | 610.5~1011.2    | 15.7~38.0  | 9, 10      |
| 45 | ammonium | [TBA][Br]                  | Diethylene glycol    | 2~4 | 303     | 590~1392.5      | 8.6~29.0   | 10         |
| 46 | ammonium | [TBA][Br]                  | Ethanolamine         | 5~7 | 298~303 | 100~2040        | 23.5~163.3 | 4, 6,<br>9 |
| 47 | ammonium | [TBA][Br]                  | Ethylene glycol      | 2~4 | 303     | 412~1374.2      | 4.5~20.1   | 10         |
| 48 | ammonium | [TBA][Br]                  | Hexanoic acid        | 2~4 | 303~323 | 444~1335        | 8.9~42.0   | 22         |
| 49 | ammonium | [TBA][Br]                  | Levulinic acid       | 3   | 303~333 | 70.2~586.4      | 1.0~11.9   | 3          |
| 50 | ammonium | [TBA][Br]                  | Methyldiethanolamine | 2~4 | 303     | 423.2~1021      | 11.5~80.0  | 10         |
| 51 | ammonium | [TBA][Br]                  | Triethanolamine      | 3~5 | 298~303 | 100~1000        | 20.7~26.2  | 6, 9       |
| 52 | ammonium | [TBA][Cl]                  | Acetic acid          | 2   | 298     | 348~2002        | 8.1~62.1   | 4          |

|    |          |                   |                            |     |         |             |             |    |
|----|----------|-------------------|----------------------------|-----|---------|-------------|-------------|----|
| 53 | ammonium | [TBA][Cl]         | Decanoic acid              | 2   | 298~323 | 90~1990     | 1.8~66.7    | 23 |
| 54 | ammonium | [TBA][Cl]         | Ethanolamine               | 5   | 303     | 100         | 176.7       | 6  |
| 55 | ammonium | [TBA][Cl]         | Lactic acid                | 2   | 308~318 | 93~1992     | 1.6~42.0    | 24 |
| 56 | ammonium | [TBA][Cl]         | Levulinic acid             | 3   | 303~333 | 63.2~591.6  | 1.1~13.3    | 3  |
| 57 | ammonium | [TEA][1,2,4-Triz] | Ethylene glycol            | 2   | 298     | 100         | 125.0       | 25 |
| 58 | ammonium | [TEA][4-PyO]      | Dimethyl sulfoxide         | 4   | 313~328 | 5~100       | 39.5~90.6   | 26 |
| 59 | ammonium | [TEA][4-PyO]      | Ethylene glycol            | 4   | 313~328 | 5~100       | 23.9~77.3   | 26 |
| 60 | ammonium | [TEA][4-PyO]      | Succinonitrile             | 4   | 313~328 | 5~100       | 25.0~71.8   | 26 |
| 61 | ammonium | [TEA][Br]         | Ethanolamine               | 5   | 303     | 100         | 192.5       | 6  |
| 62 | ammonium | [TEA][Br]         | Levulinic acid             | 3   | 303~333 | 68.7~587.8  | 0.9~10.6    | 3  |
| 63 | ammonium | [TEA][Br]         | Triethanolamine            | 5   | 303     | 100         | 34.9        | 6  |
| 64 | ammonium | [TEA][CH(CN)2]    | 1-Ethylimidazole           | 1   | 303     | 0.001~1.3   | 7.5~137.3   | 27 |
| 65 | ammonium | [TEA][CH(CN)2]    | Dimethylaminoethoxyethanol | 1   | 303     | 0.003~1.326 | 7.9~126.3   | 27 |
| 66 | ammonium | [TEA][CH(CN)2]    | Ethylene glycol            | 1   | 303     | 0.01~1.32   | 13.2~117.5  | 27 |
| 67 | ammonium | [TEA][CH(CN)2]    | Imidazole                  | 1   | 303     | 0.021~1.3   | 7.0~101.2   | 27 |
| 68 | ammonium | [TEA][CH(CN)2]    | Tetramethylene sulfone     | 1   | 303     | 0.01~1.33   | 8.8~113.1   | 27 |
| 69 | ammonium | [TEA][Car]        | 4-Methylimidazole          | 2   | 298~333 | 100         | 79.3~87.3   | 28 |
| 70 | ammonium | [TEA][Car]        | Ethylene glycol            | 2   | 298~333 | 100         | 87.2~94.8   | 28 |
| 71 | ammonium | [TEA][Cl]         | Acetic acid                | 2~3 | 298     | 281~2018    | 5.5~54.1    | 4  |
| 72 | ammonium | [TEA][Cl]         | Ethanolamine               | 2~6 | 303     | 100         | 173.6~218.4 | 6  |

|    |          |             |                      |     |         |            |             |    |
|----|----------|-------------|----------------------|-----|---------|------------|-------------|----|
| 73 | ammonium | [TEA][Cl]   | Hexanoic acid        | 2~4 | 303~323 | 388~1263   | 8.6~36.9    | 22 |
| 74 | ammonium | [TEA][Cl]   | Lactic acid          | 2   | 308~318 | 94~1993    | 1.2~29.9    | 24 |
| 75 | ammonium | [TEA][Cl]   | Levulinic acid       | 3   | 303~333 | 66.1~585.4 | 1.0~12.1    | 3  |
| 76 | ammonium | [TEA][Cl]   | Octanoic acid        | 3   | 298     | 353~2018   | 6.9~61.2    | 4  |
| 77 | ammonium | [TEA][Cl]   | Phenol               | 3   | 313     | 2120~11170 | 41.0~139.7  | 16 |
| 78 | ammonium | [TEA][Im]   | Ethylene glycol      | 2   | 298     | 100        | 129.0       | 25 |
| 79 | ammonium | [TEA][Pyrz] | Ethylene glycol      | 1   | 293     | 0.042~5    | 120.0~160.0 | 29 |
| 80 | ammonium | [TEA][Thy]  | 4-Methylimidazole    | 2   | 298     | 100        | 89.3        | 28 |
| 81 | ammonium | [TEA][Thy]  | Ethylene glycol      | 2   | 298     | 100        | 98.1        | 28 |
| 82 | ammonium | [TEMA][Cl]  | Acetic acid          | 2   | 298     | 198~1837   | 3.6~51.7    | 4  |
| 83 | ammonium | [TEMA][Cl]  | Ethylene glycol      | 2   | 298     | 138~1345   | 2.7~27.5    | 4  |
| 84 | ammonium | [TEMA][Cl]  | Glycerol             | 2   | 298     | 150~1648   | 0.7~19.1    | 4  |
| 85 | ammonium | [TEMA][Cl]  | Lactic acid          | 2   | 298     | 143~1863   | 2.1~23.4    | 4  |
| 86 | ammonium | [TEMA][Cl]  | Levulinic acid       | 2   | 298     | 136~1617   | 2.5~27.0    | 4  |
| 87 | ammonium | [TEPA][Cl]  | thymol               | 3~7 | 313~333 | 10.1~101.3 | 40.6~86.8   | 30 |
| 88 | ammonium | [TETA][Cl]  | Diethylene glycol    | 1~7 | 313     | 100        | 65.9~158.7  | 31 |
| 89 | ammonium | [TETA][Cl]  | Ethylene glycol      | 1~7 | 303~323 | 12~100     | 104.6~181.4 | 31 |
| 90 | ammonium | [TETA][Cl]  | N-Methyl pyrrolidone | 7   | 313     | 100        | 41.0        | 31 |
| 91 | ammonium | [TETA][Cl]  | thymol               | 3~7 | 313~333 | 10.1~101.3 | 42.7~90.3   | 30 |
| 92 | ammonium | [TMA][Cl]   | Ethanolamine         | 2~6 | 303     | 100        | 78.5~245.6  | 6  |

|     |             |                     |                    |       |         |                 |            |    |
|-----|-------------|---------------------|--------------------|-------|---------|-----------------|------------|----|
| 93  | ammonium    | [TMA][Cl]           | Acetic acid        | 4     | 298     | 294~2096        | 33.0~65.6  | 4  |
| 94  | ammonium    | [TMA][Cl]           | Lactic acid        | 2     | 308~318 | 95~1993         | 1.1~28.5   | 24 |
| 95  | ammonium    | [TMA][Cl]           | Phenol             | 3     | 313     | 2360~12170      | 36.2~136.4 | 16 |
| 96  | ammonium    | [TOA][Br]           | Decanoic acid      | 2     | 298~323 | 90~1990         | 1.7~58.6   | 23 |
| 97  | ammonium    | [TOA][Cl]           | Decanoic acid      | 1.5~2 | 298~323 | 90~1990         | 1.8~61.9   | 23 |
| 98  | ammonium    | [TOMA][Br]          | Decanoic acid      | 2     | 298~323 | 90~1990         | 1.8~57.5   | 23 |
| 99  | ammonium    | [TOMA][Cl]          | Decanoic acid      | 2     | 298~308 | 90~1990         | 2.0~59.5   | 23 |
| 100 | ammonium    | [TPA][Br]           | Formic acid        | 1~2   | 298~318 | 168.308~3520.14 | 2.8~103.0  | 32 |
| 101 | ammonium    | [TPA][Cl]           | Acetic acid        | 6     | 298     | 350~2030        | 11.0~75.7  | 4  |
| 102 | ammonium    | [TPA][Cl]           | Ethanolamine       | 4~7   | 298     | 357~2019        | 14.9~155.1 | 4  |
| 103 | Guanidinium | [Gua][Cl]           | Ethanolamine       | 2     | 298     | 226~2025        | 13.5~73.2  | 4  |
| 104 | imidazolium | [Bmim][Cl]          | Ethanolamine       | 1~4   | 298     | 100             | 84.0~214.0 | 33 |
| 105 | imidazolium | [Emim][1,2,4-Triz]  | Ethylene glycol    | 2~4   | 298     | 100             | 97.8~134.9 | 34 |
| 106 | imidazolium | [Emim][2-CNpyr]     | Ethylene glycol    | 1~2   | 298     | 0.041~100       | 41.8~155.0 | 35 |
| 107 | imidazolium | [Emmim][1,2,4-Triz] | Ethylene glycol    | 2~4   | 298     | 100             | 95.7~133.1 | 34 |
| 108 | imidazolium | [lPim][1,2,4-Triz]  | Ethylene glycol    | 3~5   | 298     | 100             | 81.9~103.7 | 36 |
| 109 | phosphonium | [ATPP][Br]          | Diethylene glycol  | 4~16  | 303     | 156~1954        | 8.7~320.7  | 37 |
| 110 | phosphonium | [ATPP][Br]          | Phenol             | 4~6   | 313~333 | 159.9~1387.3    | 6.0~78.7   | 38 |
| 111 | phosphonium | [ATPP][Br]          | Triethylene glycol | 4~16  | 303     | 142~1957        | 6.3~282.7  | 37 |
| 112 | phosphonium | [BTPP][Cl]          | Glycerol           | 12    | 298     | 1000            | 20.6       | 9  |

|     |             |                    |                      |     |         |              |            |    |
|-----|-------------|--------------------|----------------------|-----|---------|--------------|------------|----|
| 113 | phosphonium | [n-BTPP][Br]       | Ethylene glycol      | 12  | 298     | 1000         | 26.3       | 9  |
| 114 | phosphonium | [MTPP][Br]         | 1,2-Propanediol      | 4   | 298     | 220~2026     | 1.0~24.2   | 4  |
| 115 | phosphonium | [MTPP][Br]         | Acetic acid          | 4   | 298     | 173~2014     | 3.2~133.0  | 4  |
| 116 | phosphonium | [MTPP][Br]         | Ethanolamine         | 6~8 | 298     | 1000         | 63.2~71.6  | 9  |
| 117 | phosphonium | [MTPP][Br]         | Ethylene glycol      | 3   | 298     | 192~2018     | 2.0~15.5   | 4  |
| 118 | phosphonium | [MTPP][Br]         | Glycerol             | 4   | 298     | 161~2026     | 0.4~12.7   | 4  |
| 119 | phosphonium | [MTPP][Br]         | Levulinic acid       | 3   | 298     | 301~2068     | 1.1~30.3   | 4  |
| 120 | phosphonium | [MTPP][Br]         | Methyldiethanolamine | 7   | 313     | 101.325      | 18.0       | 39 |
| 121 | phosphonium | [P4,4,4,2COOH][Br] | Diethylene glycol    | 2   | 303~333 | 325.7~2462.8 | 14.5~266.0 | 40 |
| 122 | phosphonium | [P4,4,4,2COOH][Br] | Ethylene glycol      | 2   | 303~333 | 202.4~2191   | 9.6~191.5  | 40 |
| 123 | phosphonium | [P4,4,4,2NH2][Br]  | Diethylene glycol    | 4   | 303~333 | 223.6~2256.4 | 8.5~157.8  | 40 |
| 124 | phosphonium | [P4,4,4,2NH2][Br]  | Ethylene glycol      | 4   | 303~333 | 249~2302.4   | 9.2~153.6  | 40 |
| 125 | phosphonium | [P4,4,4,2OH][Br]   | Diethylene glycol    | 2   | 303~333 | 202.3~2472.7 | 9.0~584.7  | 40 |
| 126 | phosphonium | [P4,4,4,2OH][Br]   | Ethylene glycol      | 2   | 303~333 | 146.7~2293.5 | 6.7~176.0  | 40 |
| 127 | phosphonium | [P4,4,4,2][Br]     | Diethylene glycol    | 2   | 303~333 | 176.8~2551   | 6.8~187.0  | 40 |
| 128 | phosphonium | [P4,4,4,2][Br]     | Ethylene glycol      | 2   | 303~333 | 147.5~2477.4 | 4.6~152.6  | 40 |
| 129 | phosphonium | [TBP][Br]          | Diethylene glycol    | 4   | 313~333 | 94.4~1398.1  | 3.8~77.6   | 38 |
| 130 | phosphonium | [TBP][Br]          | Phenol               | 4   | 313~333 | 163.8~1578.5 | 5.8~79.2   | 38 |
| 131 | phosphonium | [TEP][1,2,4-Triz]  | Ethylene glycol      | 2   | 298     | 100          | 118.0      | 25 |
| 132 | phosphonium | [TEP][Im]          | Ethylene glycol      | 2   | 298     | 100          | 118.0      | 25 |

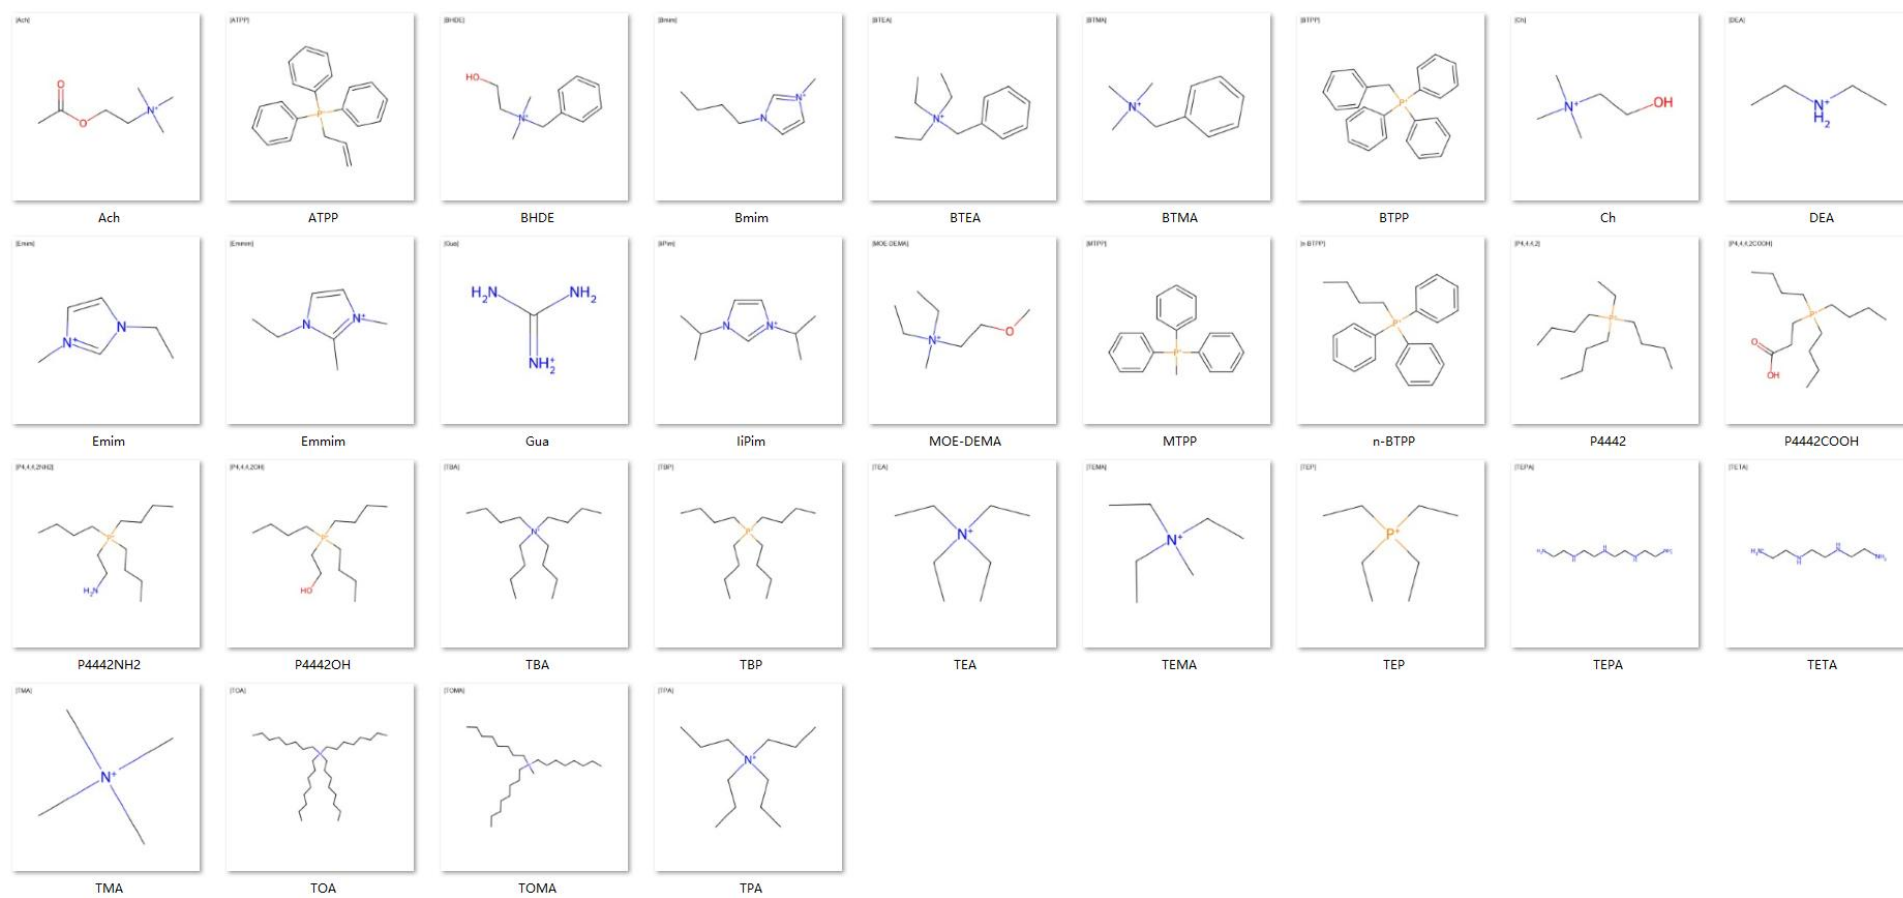

**Figure S1.** Typical structures of cations.

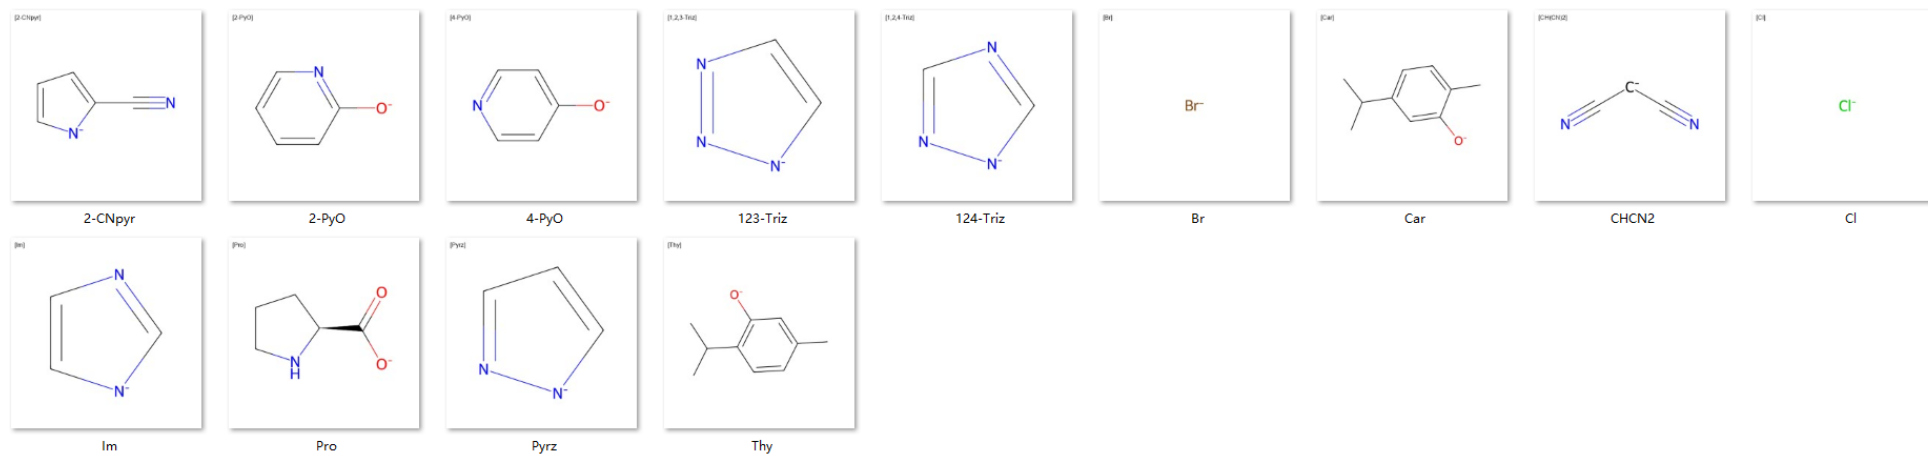

**Figure S2.** Typical structures of anions.

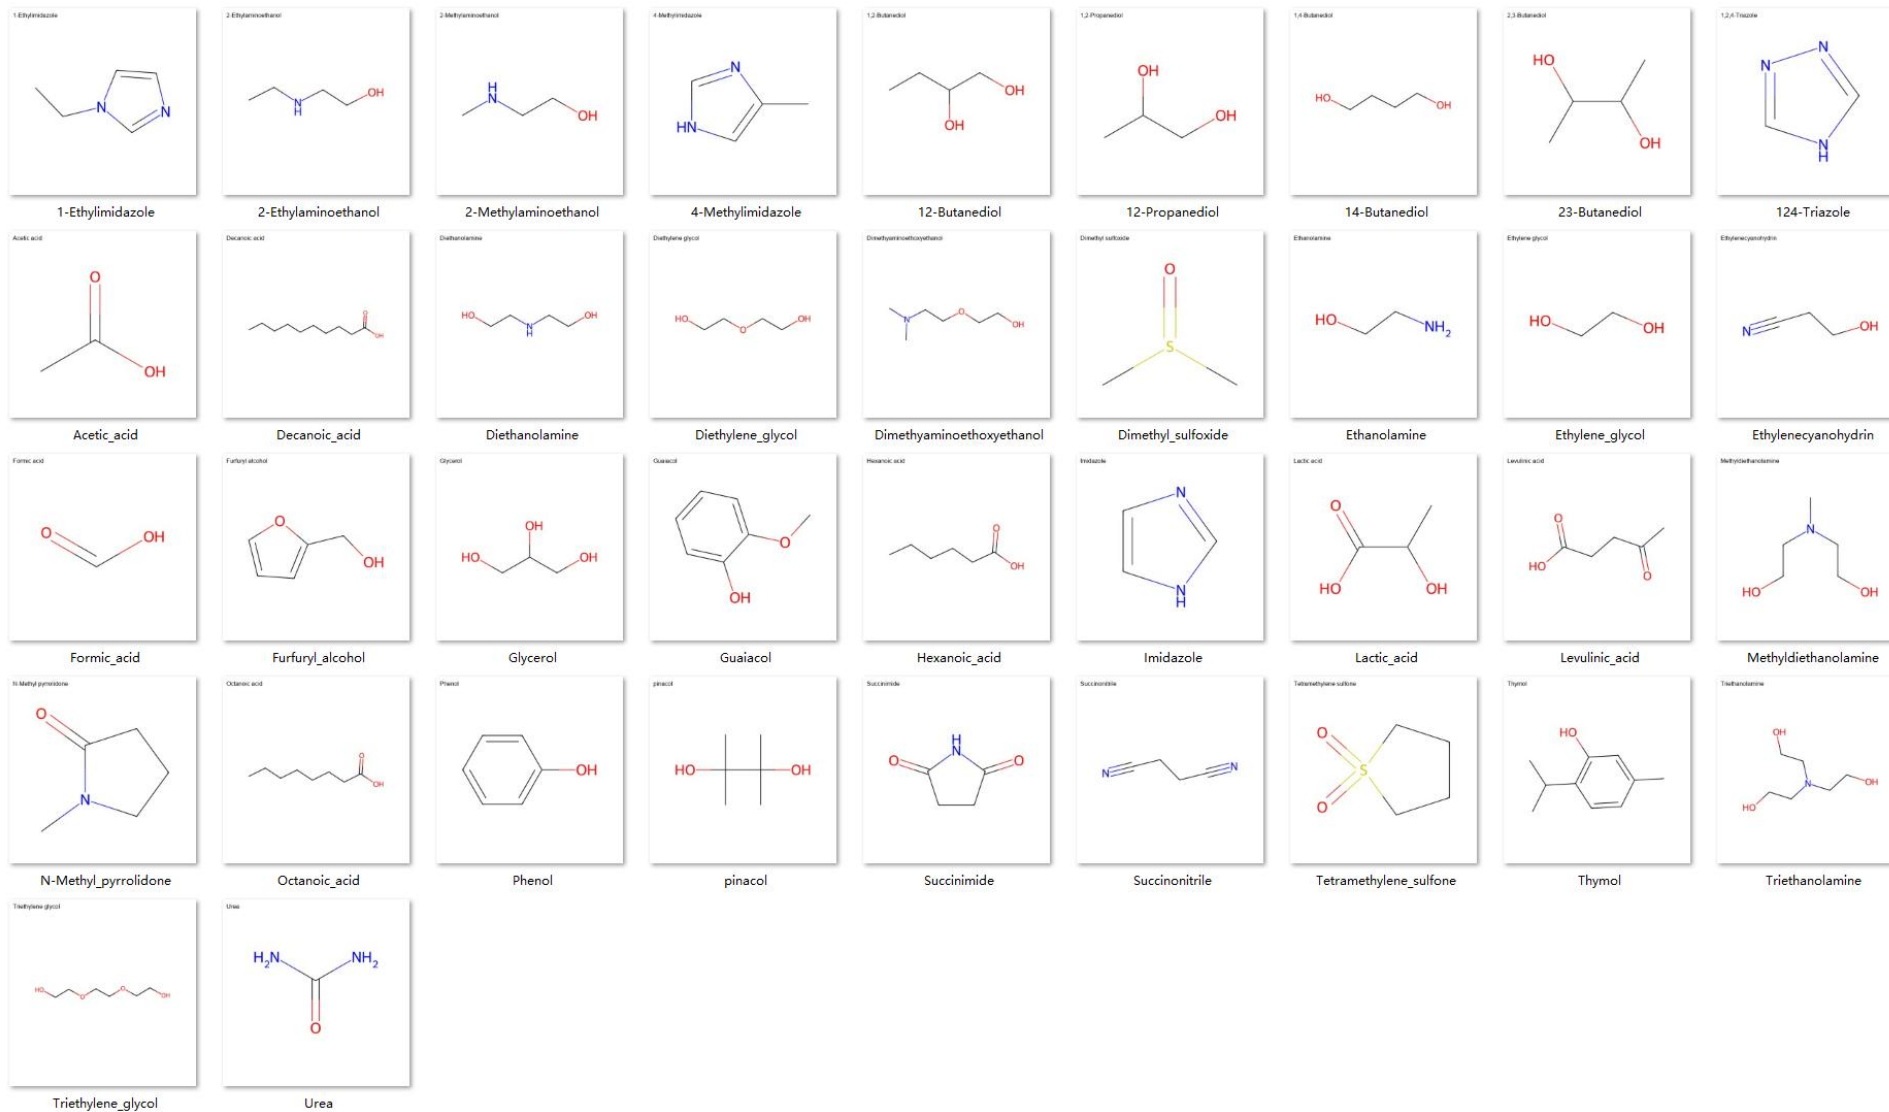

Figure S3. Typical structures of HBDs.

## Models

### RBF kernel

Support Vector Machine (SVM) is a supervised ML algorithm primarily used for classification, which finds an optimal hyperplane to maximize the margin between different classes and can handle non-linear data through kernel functions. Support Vector Regression (SVR) is a kind of SVM used in regression.

RBF kernel (hyperparameters:  $C, \gamma$ ) is often the default and most popular choice for SVR, as described by the following equation:

$$K(x, x_i) = \exp(-\gamma \cdot \|x - x_i\|^2)$$

The regularization parameter  $C$  is a universal hyperparameter, which controls the overall tolerance for errors, and  $\gamma$  defines the local influence of data points, which monitors the amplitude of the kernel function.<sup>41</sup> These parameters profoundly impact the model performance. Besides, the coefficients  $W$  and  $b$  can be obtained through minimizing the following equation:

$$\min_{W, b, \xi, \xi^*} \frac{1}{2} \|W\|^2 + C \sum_{i=1}^N (\xi_i + \xi_i^*)$$

$\xi_i$  and  $\xi_i^*$  are slack variables for each point, representing positive error and negative error, respectively. That is, slack variables allow regression errors to exist up to the value of  $\xi_i$  and  $\xi_i^*$ . The relationship among them is:

$$\begin{cases} y_i - \langle W, x_i \rangle - b \leq \varepsilon + \xi_i \\ \langle W, x_i \rangle + b - y_i \leq \varepsilon + \xi_i^* \\ \xi_i \geq 0, \xi_i^* \geq 0, i = 1, \dots, N \end{cases}$$

### Least Squares Support Vector Machine (LSSVM) Model

Least Squares Support Vector Machine (LSSVM) for regression (LSSVR) is building directly upon SVR by replacing the inequality constraints and the  $\varepsilon$ -insensitive loss with equality constraints and a least squares cost function. Its optimization problem is:

$$\min_{W,b,e} \frac{1}{2} \|W\|^2 + \frac{\gamma}{2} \sum_{i=1}^N e_i^2$$
$$y_i = \langle W, x_i \rangle + b + e_i$$

where  $e_i$  represents the direct error for each sample, and the regularization parameter  $\gamma$  plays a role analogous to  $C$  in SVR, controlling the trade-off between model smoothness and fitting error. Thus, a faster and more straightforward training is obtained, making LSSVR efficient for regression tasks like predicting CO<sub>2</sub> absorption capacity of DESs.

### Graph Neural Networks (GNNs) Model

Graph Neural Networks (GNNs) offer a paradigm shift by directly operating on molecular graphs, where atoms are represented as nodes and chemical bonds as edges. In graph theory, a graph  $G$  is defined as:

$$G = (V, E)$$

where  $V$  is a set of nodes and  $E$  is a set of edges. Each node can have a feature vector (e.g. atom type, charge, hybridization), and each edge can have features (e.g. bond type, length). Nodes and edges are computed by RDKit. The core operation of GNNs is message passing, which allows each node to iteratively gather and combine information from its neighboring nodes to refine its own feature representation.

## References

1. Li, X.; Liu, X.; Deng, D., Solubilities and Thermodynamic Properties of CO<sub>2</sub> in Four Azole-Based Deep Eutectic Solvents. *J. Chem. Eng. Data* **2018**, *63* (6), 2091-2096.
2. Liu, X.; Gao, B.; Jiang, Y.; Ai, N.; Deng, D., Solubilities and Thermodynamic Properties of Carbon Dioxide in Guaiacol-Based Deep Eutectic Solvents. *J. Chem. Eng. Data* **2017**, *62* (4), 1448-1455.
3. Deng, D.; Jiang, Y.; Liu, X.; Zhang, Z.; Ai, N., Investigation of solubilities of carbon dioxide in five levulinic acid-based deep eutectic solvents and their thermodynamic properties. *J. Chem. Thermodyn.* **2016**, *103*, 212-217.
4. Sarmad, S.; Xie, Y.; Mikkola, J.-P.; Ji, X., Screening of deep eutectic solvents (DESs) as green CO<sub>2</sub> sorbents: from solubility to viscosity. *New J. Chem.* **2017**, *41* (1), 290-301.
5. Haider, M. B.; Kumar, R., Solubility of CO<sub>2</sub> and CH<sub>4</sub> in sterically hindered amine-based deep eutectic solvents. *Sep. Purif. Technol.* **2020**, *248*, 117055.
6. Li, Z.; Wang, L.; Li, C.; Cui, Y.; Li, S.; Yang, G.; Shen, Y., Absorption of Carbon Dioxide Using Ethanolamine-Based Deep Eutectic Solvents. *ACS Sustainable Chem. Eng.* **2019**, *7* (12), 10403-10414.
7. Haghbakhsh, R.; Keshtkar, M.; Shariati, A.; Raeissi, S., A comprehensive experimental and modeling study on CO<sub>2</sub> solubilities in the deep eutectic solvent based on choline chloride and butane-1,2-diol. *Fluid Phase Equilib.* **2022**, *561*, 113535.
8. Chen, Y.; Ai, N.; Li, G.; Shan, H.; Cui, Y.; Deng, D., Solubilities of Carbon Dioxide in Eutectic Mixtures of Choline Chloride and Dihydric Alcohols. *J. Chem. Eng. Data* **2014**, *59* (4), 1247-1253.
9. Ali, E.; Hadj-Kali, M. K.; Mulyono, S.; Alnashef, I.; Fakeeha, A.; Mjalli, F.; Hayyan, A., Solubility of CO<sub>2</sub> in deep eutectic solvents: Experiments and modelling using the Peng–Robinson equation of state. *Chem. Eng. Res. Des.* **2014**, *92* (10), 1898-1906.
10. Haider, M. B.; Jha, D.; Marriyappan Sivagnanam, B.; Kumar, R., Thermodynamic and Kinetic Studies of CO<sub>2</sub> Capture by Glycol and Amine-Based Deep Eutectic Solvents. *J. Chem. Eng. Data* **2018**, *63* (8), 2671-2680.
11. Li, G.; Deng, D.; Chen, Y.; Shan, H.; Ai, N., Solubilities and thermodynamic properties of CO<sub>2</sub> in choline-chloride based deep eutectic solvents. *J. Chem. Thermodyn.* **2014**, *75*, 58-62.
12. Sarmad, S.; Nikjoo, D.; Mikkola, J.-P., Amine functionalized deep eutectic solvent for CO<sub>2</sub> capture: Measurements and modeling. *J. Mol. Liq.* **2020**, *309*, 113159.
13. Song, Z.; Hu, X.; Wu, H.; Mei, M.; Linke, S.; Zhou, T.; Qi, Z.; Sundmacher, K., Systematic Screening of Deep Eutectic Solvents as Sustainable Separation Media Exemplified by the CO<sub>2</sub> Capture Process. *ACS Sustainable Chem. Eng.* **2020**, *8* (23), 8741-8751.

14. Lu, M.; Han, G.; Jiang, Y.; Zhang, X.; Deng, D.; Ai, N., Solubilities of carbon dioxide in the eutectic mixture of levulinic acid (or furfuryl alcohol) and choline chloride. *J. Chem. Thermodyn.* **2015**, *88*, 72-77.
15. Leron, R. B.; Li, M.-H., Solubility of carbon dioxide in a eutectic mixture of choline chloride and glycerol at moderate pressures. *J. Chem. Thermodyn.* **2013**, *57*, 131-136.
16. Ji, Y.; Hou, Y.; Ren, S.; Yao, C.; Wu, W., Phase equilibria of high pressure CO<sub>2</sub> and deep eutectic solvents formed by quaternary ammonium salts and phenol. *Fluid Phase Equilib.* **2016**, *429*, 14-20.
17. Zhang, Z.; Hu, S.; Chen, W.; Tang, Q.; Xu, B.; Pan, Y., A novel CO<sub>2</sub> absorbent with high uptake and low regeneration energy consumption. *J. Environ. Chem. Eng.* **2025**, *13* (5), 118234.
18. Al-Bodour, A.; Alomari, N.; Gutiérrez, A.; Aparicio, S.; Atilhan, M., High-pressure carbon dioxide solubility in terpene based deep eutectic solvents. *J. Environ. Chem. Eng.* **2022**, *10* (5), 108237.
19. Chen, M.; Xu, J., CO<sub>2</sub> Capture Mechanism by Deep Eutectic Solvents Formed by Choline Proline and Ethylene Glycol. *Molecules* **2023**, *28* (14), 5461.
20. Chen, M.; Zhang, S.; Mei, Q.; Zhou, H.; Yang, D., CO<sub>2</sub> capture by anion-functionalized deep eutectic solvents: the effect of steric hindrance of -OH groups. *Chem. Commun.* **2025**, *61* (23), 4519-4522.
21. Wang, Z.; Wu, C.; Wang, Z.; Zhang, S.; Yang, D., CO<sub>2</sub> capture by 1,2,3-triazole-based deep eutectic solvents: the unexpected role of hydrogen bonds. *Chem. Commun.* **2022**, *58* (53), 7376-7379.
22. Luo, F.; Liu, X.; Chen, S.; Song, Y.; Yi, X.; Xue, C.; Sun, L.; Li, J., Comprehensive Evaluation of a Deep Eutectic Solvent Based CO<sub>2</sub> Capture Process through Experiment and Simulation. *ACS Sustainable Chem. Eng.* **2021**, *9* (30), 10250-10265.
23. Zubeir, L. F.; van Osch, D. J. G. P.; Rocha, M. A. A.; Banat, F.; Kroon, M. C., Carbon Dioxide Solubilities in Decanoic Acid-Based Hydrophobic Deep Eutectic Solvents. *J. Chem. Eng. Data* **2018**, *63* (4), 913-919.
24. Zubeir, L. F.; Lacroix, M. H. M.; Kroon, M. C., Low Transition Temperature Mixtures as Innovative and Sustainable CO<sub>2</sub> Capture Solvents. *J. Phys. Chem. B* **2014**, *118* (49), 14429-14441.
25. Cui, G.; Lv, M.; Yang, D., Efficient CO<sub>2</sub> absorption by azolide-based deep eutectic solvents. *Chem. Commun.* **2019**, *55* (10), 1426-1429.
26. Cui, G.; Xu, Y.; Hu, D.; Zhou, Y.; Ge, C.; Liu, H.; Fan, W.; Zhang, Z.; Chen, B.; Ke, Q.; Chen, Y.; Zhou, B.; Zhang, W.; Zhang, R.; Lu, H., Tuning functional ionic deep eutectic solvents as green sorbents and catalysts for highly efficient capture and transformation of CO<sub>2</sub> to quinazoline-2,4(1H,3H)-dione and its derivatives. *Chem. Eng. J.* **2023**, *469*, 143991.
27. Chen, M.; Xiong, W.; Chen, W.; Li, S.; Zhang, F.; Wu, Y., Synergy of carbanion siting and hydrogen bonding in super-nucleophilic deep eutectic solvents for efficient CO<sub>2</sub> capture. *AIChE J.* **2024**, *70* (4), e18319.

28. Wang, Z.; Wang, Z.; Chen, J.; Wu, C.; Yang, D., The Influence of Hydrogen Bond Donors on the CO<sub>2</sub> Absorption Mechanism by the Bio-Phenol-Based Deep Eutectic Solvents. *Molecules* **2021**, *26* (23), 7167.
29. Cui, G.; Cheng, Y.; Zhang, W.; Shen, X.; Li, L.; Zhang, R.; Chen, Y.; Ke, Q.; Ge, C.; Liu, H.; Fan, W.; Lu, H., Highly efficient CO<sub>2</sub> capture from open air and dilute gas streams by tunable azolate ionic liquids based deep eutectic solvents. *Chem. Eng. J.* **2025**, *505*, 159193.
30. Gu, Y.; Hou, Y.; Ren, S.; Sun, Y.; Wu, W., Hydrophobic Functional Deep Eutectic Solvents Used for Efficient and Reversible Capture of CO<sub>2</sub>. *ACS Omega* **2020**, *5* (12), 6809-6816.
31. Zhang, K.; Hou, Y.; Wang, Y.; Wang, K.; Ren, S.; Wu, W., Efficient and Reversible Absorption of CO<sub>2</sub> by Functional Deep Eutectic Solvents. *Energy Fuels* **2018**, *32* (7), 7727-7733.
32. Manafpour, A. A.; Feyzi, F.; Rezaee, M., An environmentally friendly deep eutectic solvent for CO<sub>2</sub> capture. *Sci. Rep.* **2024**, *14* (1), 19744.
33. Cao, L.; Huang, J.; Zhang, X.; Zhang, S.; Gao, J.; Zeng, S., Imidazole tailored deep eutectic solvents for CO<sub>2</sub> capture enhanced by hydrogen bonds. *Phys. Chem. Chem. Phys.* **2015**, *17* (41), 27306-27316.
34. Zhu, J.; Lu, B.; Yang, D., Efficient CO<sub>2</sub> capture by deep eutectic solvents through reducing the reaction between carbenes and CO<sub>2</sub>. *New J. Chem.* **2025**, *49* (5), 1875-1882.
35. Lee, Y.-Y.; Penley, D.; Klemm, A.; Dean, W.; Gurkan, B., Deep Eutectic Solvent Formed by Imidazolium Cyanopyrrolide and Ethylene Glycol for Reactive CO<sub>2</sub> Separations. *ACS Sustainable Chem. Eng.* **2021**, *9* (3), 1090-1098.
36. Chen, M.; Zhou, Y.; Lu, Q.; Yang, D., CO<sub>2</sub> capture by imidazolium-based deep eutectic solvents: the effect of steric hindrance of N-heterocyclic carbenes. *Chem. Commun.* **2024**, *60* (55), 7061-7064.
37. Ghaedi, H.; Ayoub, M.; Sufian, S.; Shariff, A. M.; Hailegiorgis, S. M.; Khan, S. N., CO<sub>2</sub> capture with the help of Phosphonium-based deep eutectic solvents. *J. Mol. Liq.* **2017**, *243*, 564-571.
38. Wang, J.; Cheng, H.; Song, Z.; Chen, L.; Deng, L.; Qi, Z., Carbon Dioxide Solubility in Phosphonium-Based Deep Eutectic Solvents: An Experimental and Molecular Dynamics Study. *Ind. Eng. Chem. Res.* **2019**, *58* (37), 17514-17523.
39. Zhang, Y.; Han, R.; Zhou, S.; Wang, X.; Zhao, J.; Zhang, Y.; Wang, L.; Sun, X.; Xia, L.; Xiang, S., Amine-based deep eutectic solvents for CO<sub>2</sub> capture: Experiments and molecular thermodynamics. *Sep. Purif. Technol.* **2025**, *359*, 130559.
40. Cui, Y.; Wang, X.; Zhang, X.; Chen, S.; Liu, Y.; Zhang, J.; Dong, L.; Shi, L.; Zhang, X., Performance and Mechanism Study on Functionalized Phosphonium-Based Deep Eutectic Solvents for CO<sub>2</sub> Absorption. *Int. J. Thermophys.* **2023**, *44* (7), 98.
41. Zhang, R.; Cui, G.; Zhang, W.; Li, K.; Li, L.; Shen, X.; Ge, C.; Zhang, W.; Fan, W.; Zhou, Y.; Tian, Y.; Niu, X.; Zhan, G.; Ke, Q.; Ren, S.; Zhang, X.; Lu, H., Artificial Intelligence-Enhanced CO<sub>2</sub> Capture Capacity Predictions of Functional Ionic Liquids Based on Group Contribution Descriptors. *ACS Sustainable Chem. Eng.* **2025**, *13* (46), 19977-19994.
